# Supplementary material for: Bioactive Alpha-Pyrone and Phenolic Glucosides from the Marine-Derived Metarhizium sp. P2100
Source: MDPI journal article supplement (doi:10.3390/jof9010028), 2022-12-23
Supplement: s1 [file s1]

## List of Supplementary Material

- Figure S1.**  $^1\text{H}$  NMR (400 MHz, Methanol- $d_4$ ) spectrum of compound **1**
- Figure S2.**  $^{13}\text{C}$  NMR (100MHz, Methanol- $d_4$ ) spectrum of compound **1**
- Figure S3.** The HSQC (Methanol- $d_4$ ) spectrum of compound **1**
- Figure S4.** The  $^1\text{H}$ - $^1\text{H}$  COSY (Methanol- $d_4$ ) spectrum of compound **1**
- Figure S5.** The HMBC (Methanol- $d_4$ ) spectrum of compound **1**
- Figure S6.** The HRESIMS spectrum of compound **1**
- Figure S7.** The IR spectrum of compound **1**
- Figure S8.**  $^1\text{H}$  NMR (400 MHz, Methanol- $d_4$ ) spectrum of compound **2**
- Figure S9.**  $^{13}\text{C}$  NMR (100MHz, Methanol- $d_4$ ) spectrum of compound **2**
- Figure S10.** The HSQC (Methanol- $d_4$ ) spectrum of compound **2**
- Figure S11.** The  $^1\text{H}$ - $^1\text{H}$  COSY (Methanol- $d_4$ ) spectrum of compound **2**
- Figure S12.** The HMBC (Methanol- $d_4$ ) spectrum of compound **2**
- Figure S13.** The NOESY (Methanol- $d_4$ ) spectrum of compound **2**
- Figure S14.** The HRESIMS spectrum of compound **2**
- Figure S15.** The IR spectrum of compound **2**
- Figure S16.**  $^1\text{H}$  NMR (400 MHz, Methanol- $d_4$ ) spectrum of compound **3**
- Figure S17.**  $^{13}\text{C}$  NMR (100MHz, Methanol- $d_4$ ) spectrum of compound **3**
- Figure S18.** The HSQC (Methanol- $d_4$ ) spectrum of compound **3**
- Figure S19.** The  $^1\text{H}$ - $^1\text{H}$  COSY (Methanol- $d_4$ ) spectrum of compound **3**
- Figure S20.** The HMBC (Methanol- $d_4$ ) spectrum of compound **3**
- Figure S21.** The NOESY (Methanol- $d_4$ ) spectrum of compound **3**
- Figure S22.** The HRESIMS spectrum of compound **3**
- Figure S23.** The IR spectrum of compound **3**
- Figure S24.**  $^1\text{H}$  NMR (400 MHz, Methanol- $d_4$ ) spectrum of compound **4**
- Figure S25.**  $^{13}\text{C}$  NMR (100MHz, Methanol- $d_4$ ) spectrum of compound **4**
- Figure S26.** The HSQC (Methanol- $d_4$ ) spectrum of compound **4**
- Figure S27.** The  $^1\text{H}$ - $^1\text{H}$  COSY (Methanol- $d_4$ ) spectrum of compound **4**
- Figure S28.** The HMBC (Methanol- $d_4$ ) spectrum of compound **4**
- Figure S29.** The NOESY (Methanol- $d_4$ ) spectrum of compound **4**
- Figure S30.** The HRESIMS spectrum of compound **4**
- Figure S31.** The IR spectrum of compound **4**

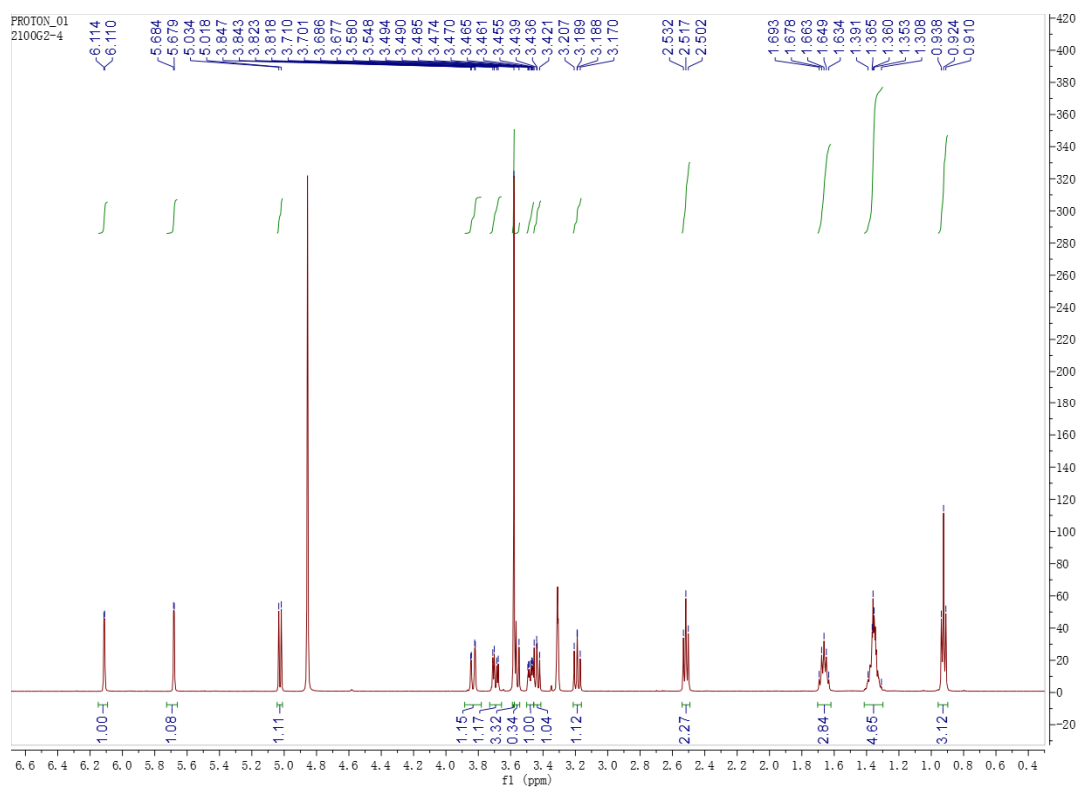

Figure S1.  $^1\text{H}$  NMR (400 MHz, Methanol- $d_4$ ) spectrum of compound 1

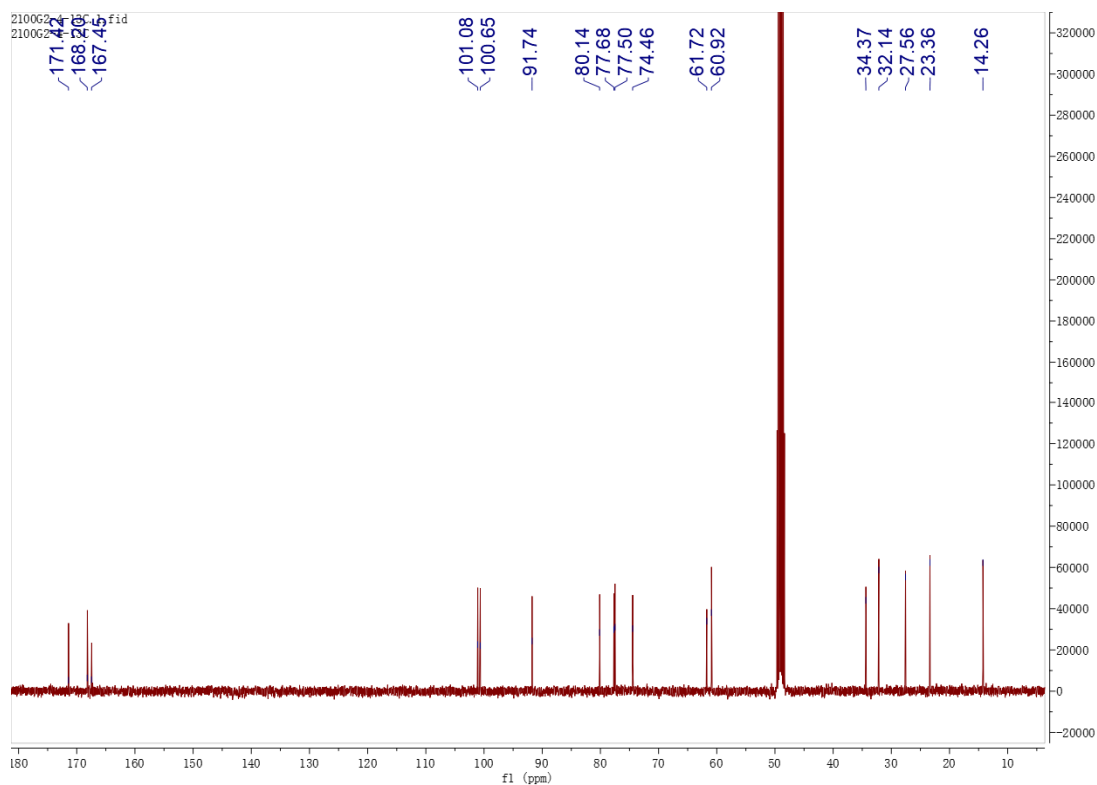

Figure S2.  $^{13}\text{C}$  NMR (100MHz, Methanol- $d_4$ ) spectrum of compound 1

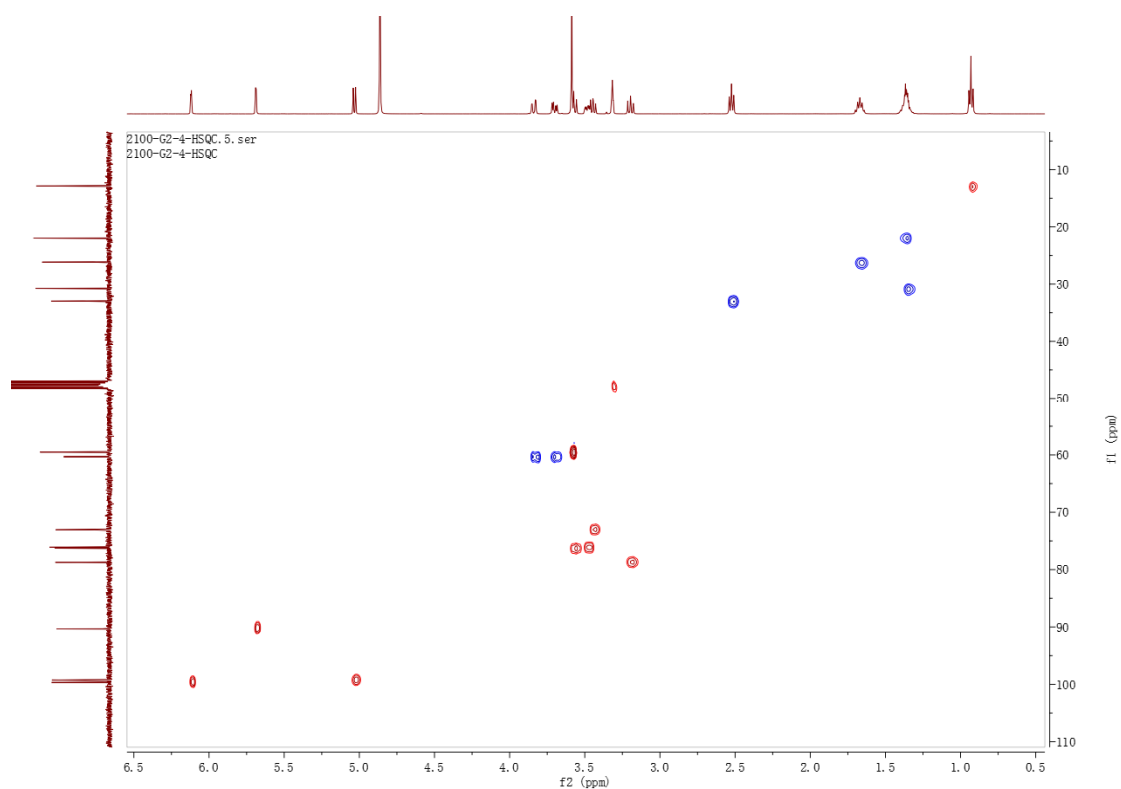

**Figure S3.** The HSQC (Methanol- $d_4$ ) spectrum of compound **1**

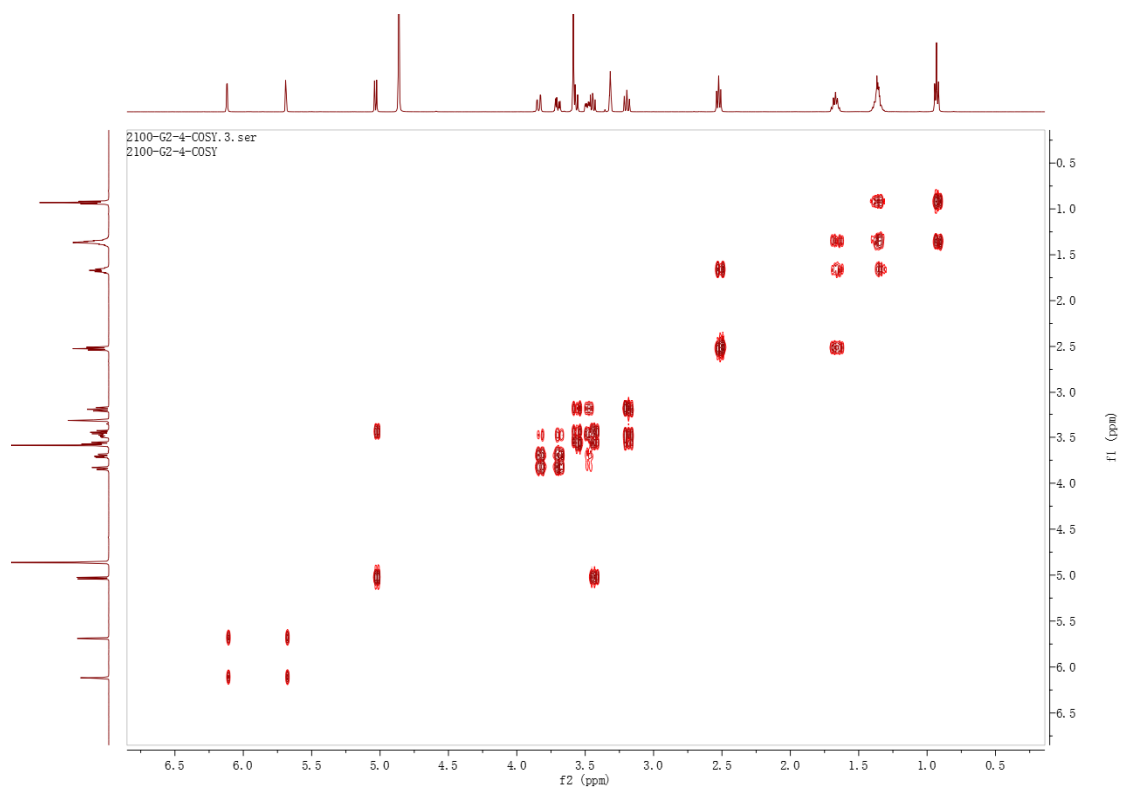

**Figure S4.** The  $^1\text{H}$ - $^1\text{H}$  COSY (Methanol- $d_4$ ) spectrum of compound **1**

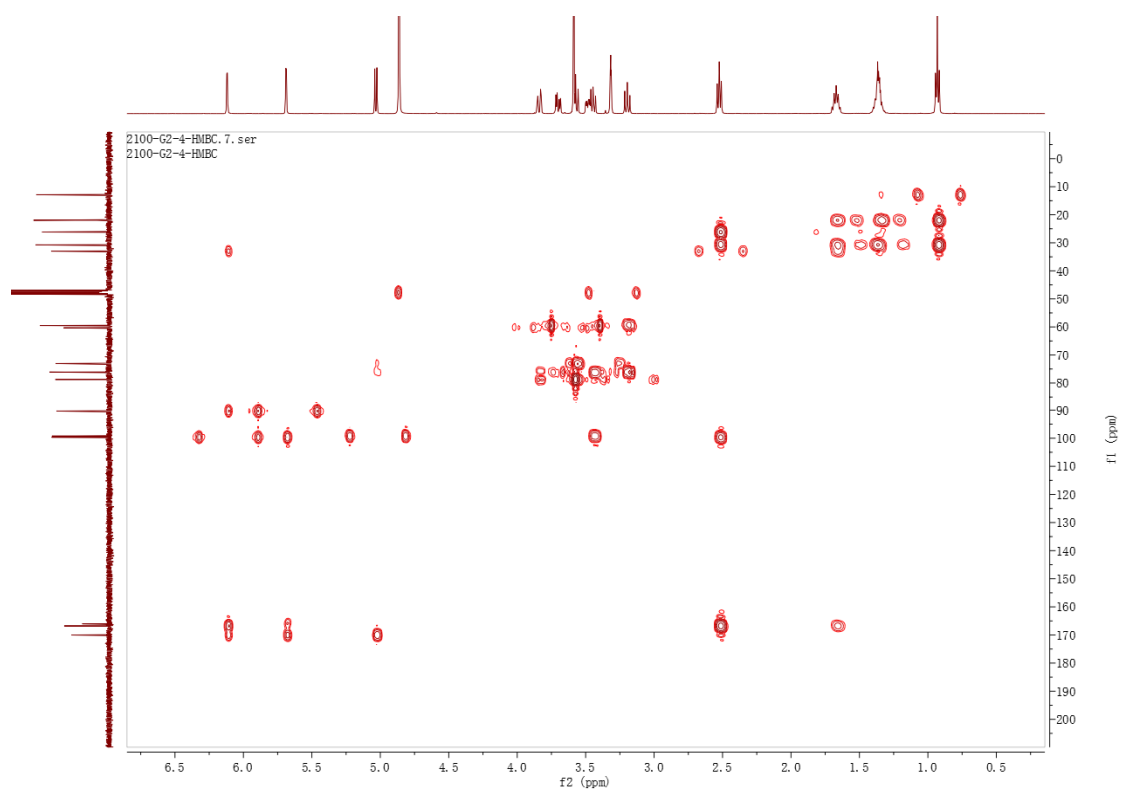

**Figure S5.** The HMBC (Methanol- $d_4$ ) spectrum of compound **1**

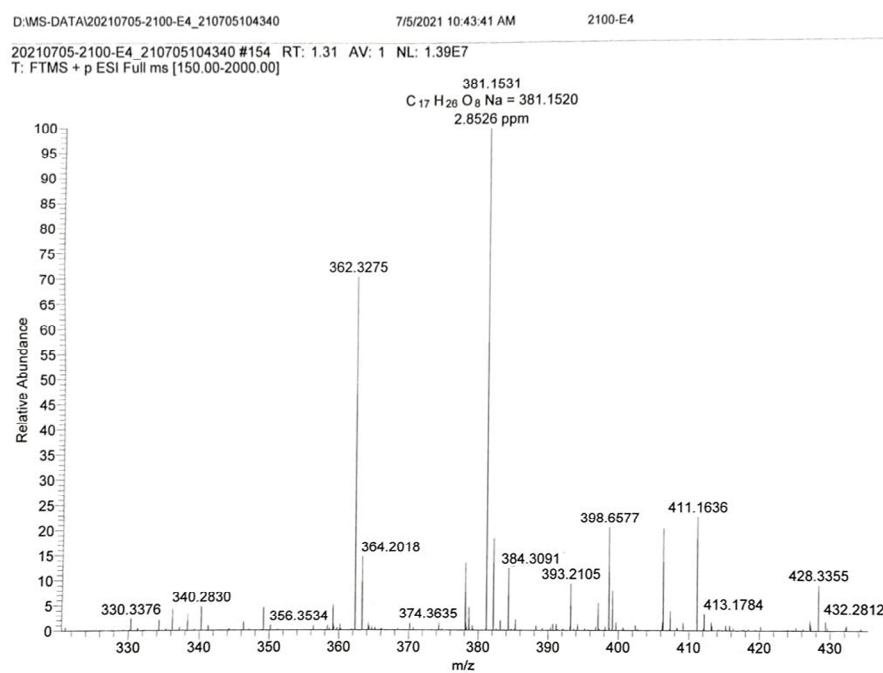

**Figure S6.** The HRESIMS spectrum of compound **1**

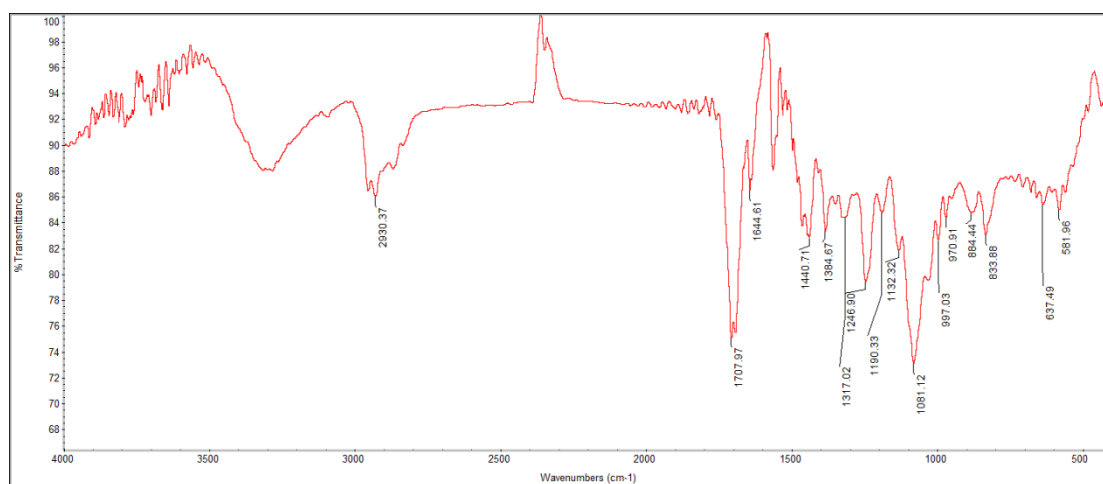

**Figure S7.** The IR spectrum of compound **1**

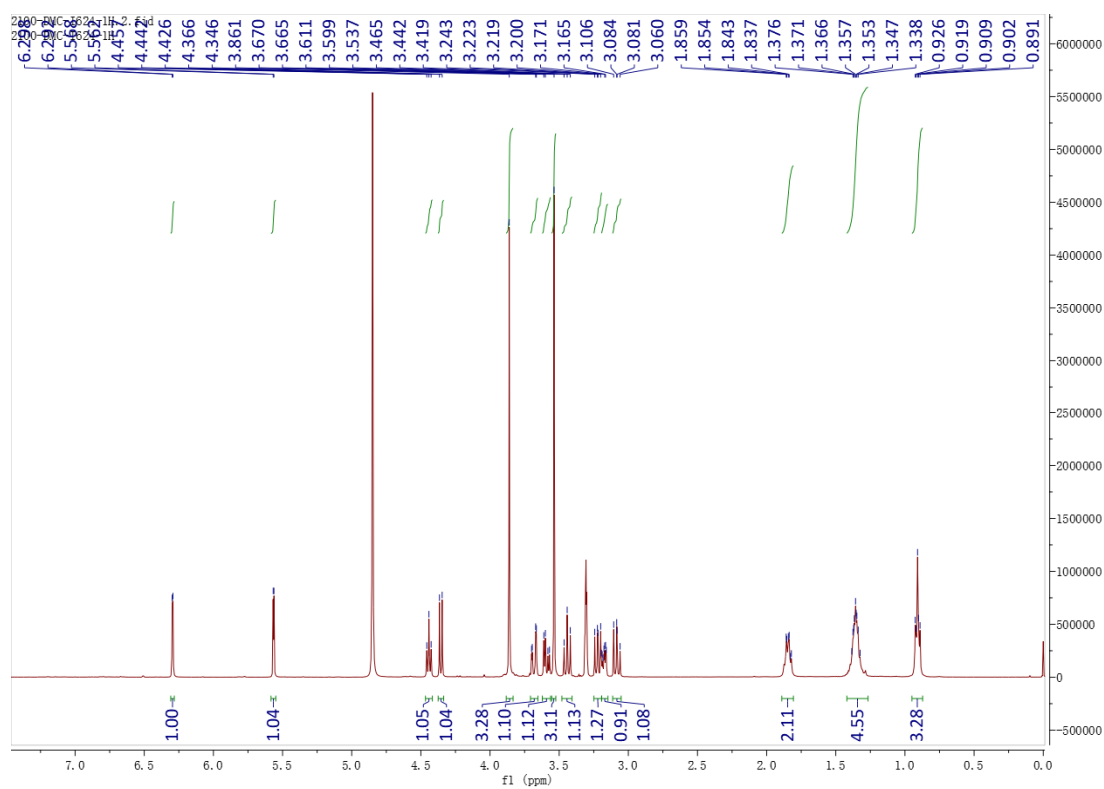

**Figure S8.** <sup>1</sup>H NMR (400 MHz, Methanol-*d*<sub>4</sub>) spectrum of compound **2**

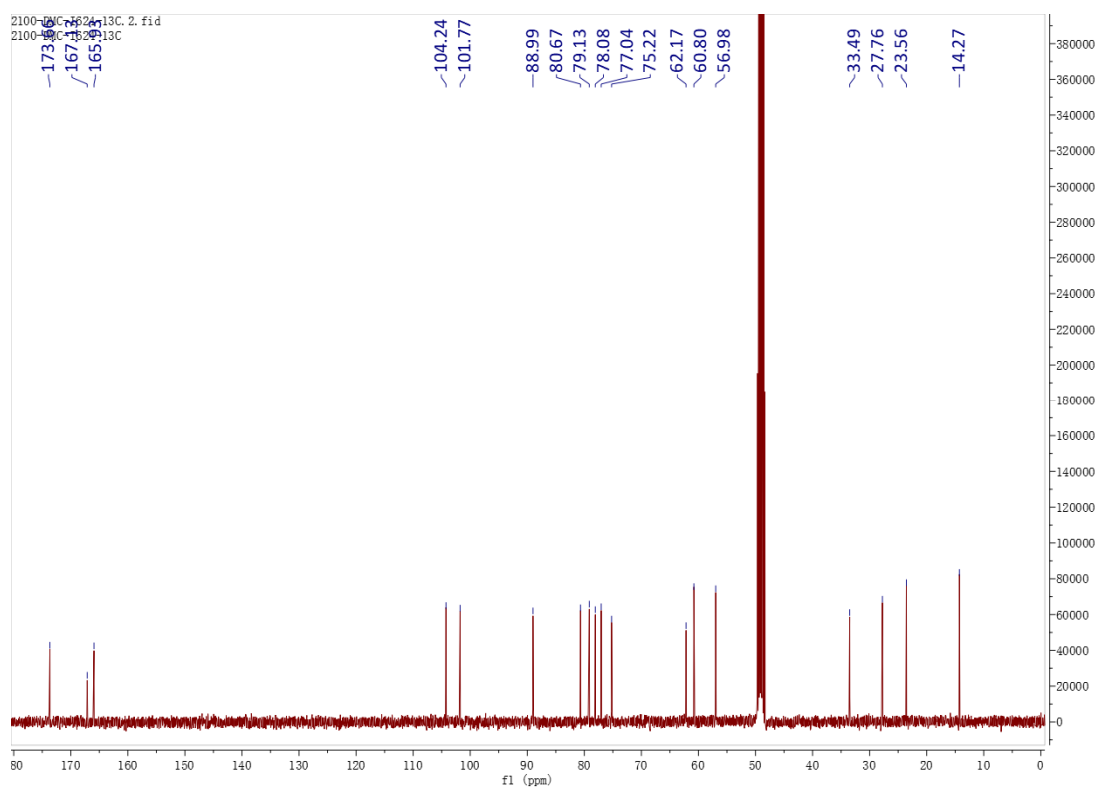

**Figure S9.**  $^{13}\text{C}$  NMR (100 MHz, Methanol- $d_4$ ) spectrum of compound **2**

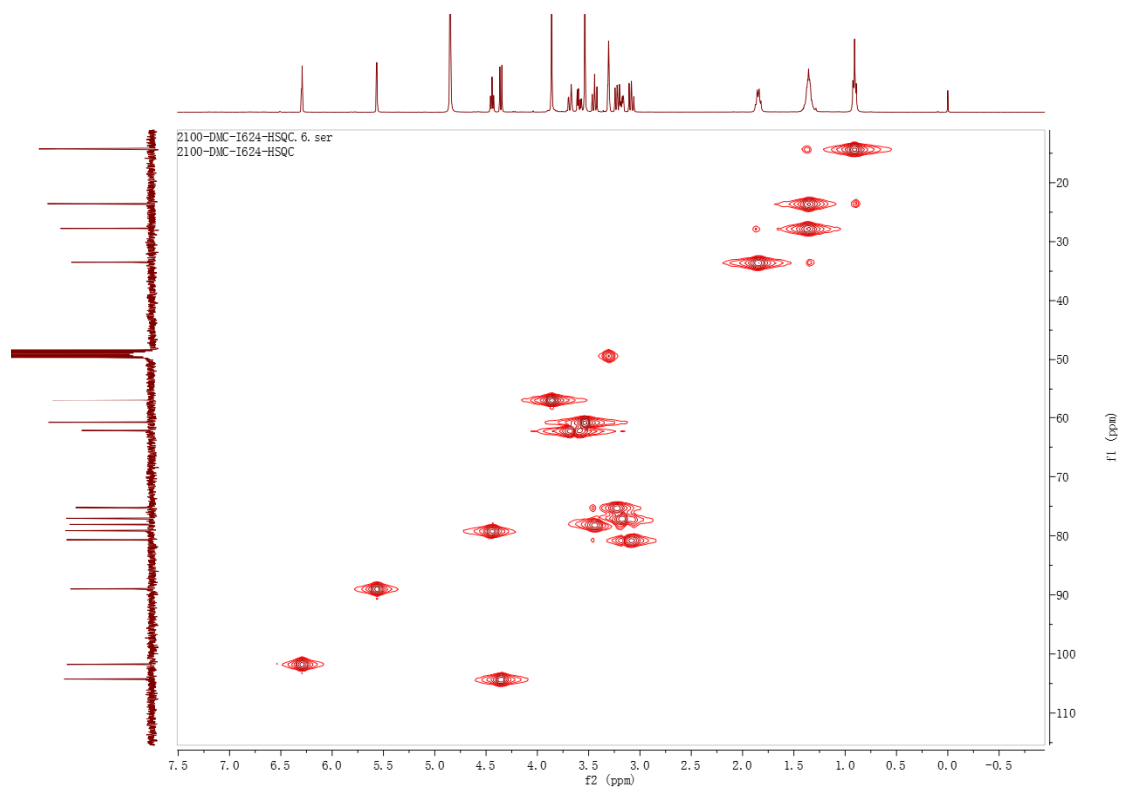

**Figure S10.** The HSQC (Methanol- $d_4$ ) spectrum of compound **2**

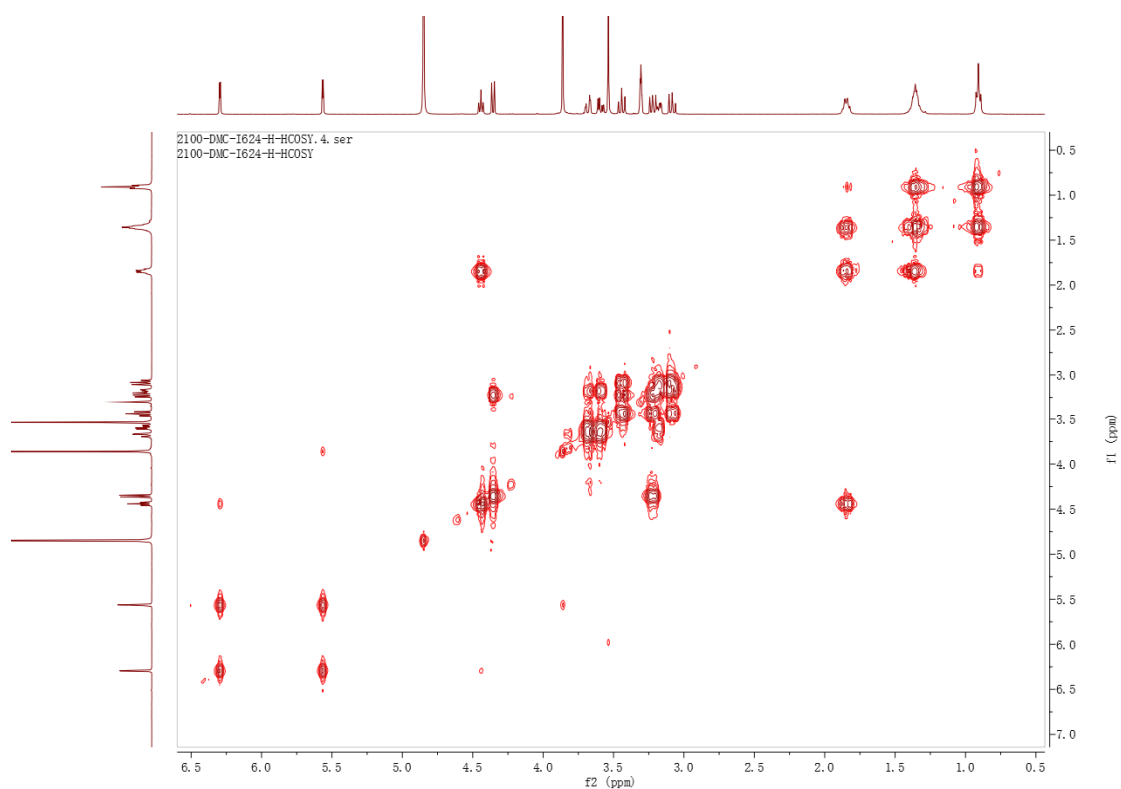

**Figure S11.** The  $^1\text{H}$ - $^1\text{H}$  COSY (Methanol- $d_4$ ) spectrum of compound **2**

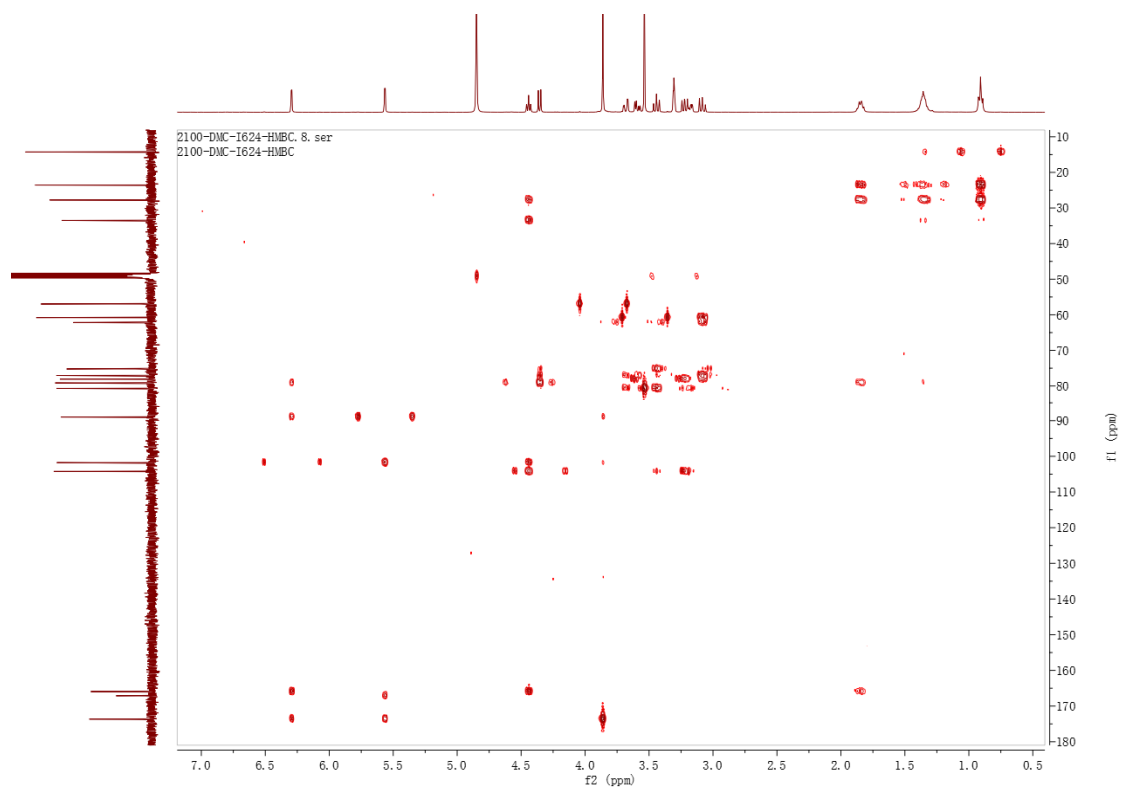

**Figure S12.** The HMB (Methanol- $d_4$ ) spectrum of compound **2**

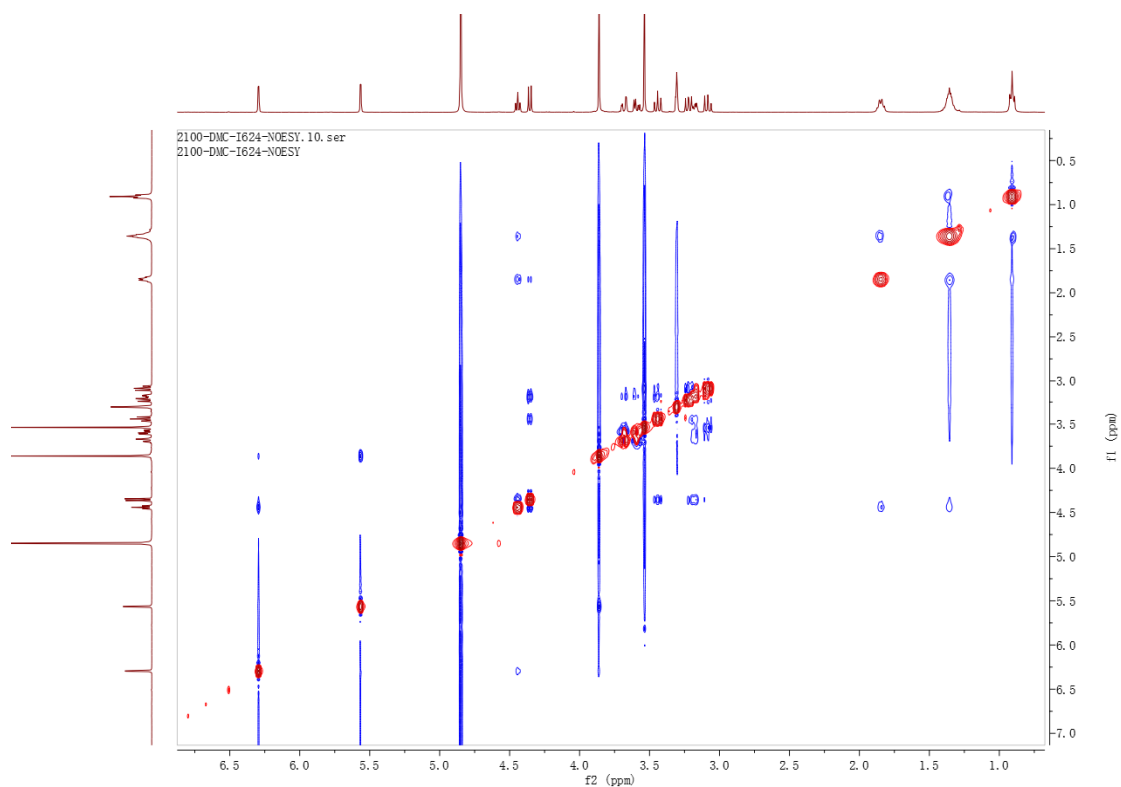

**Figure S13.** The NOESY (Methanol- $d_4$ ) spectrum of compound **2**

20201011-D2100-E-3\_201011100837 #92-94 RT: 0.76-0.78 AV: 3 NL: 3.10E7  
T: FTMS + p ESI Full ms [150.00-2000.00]

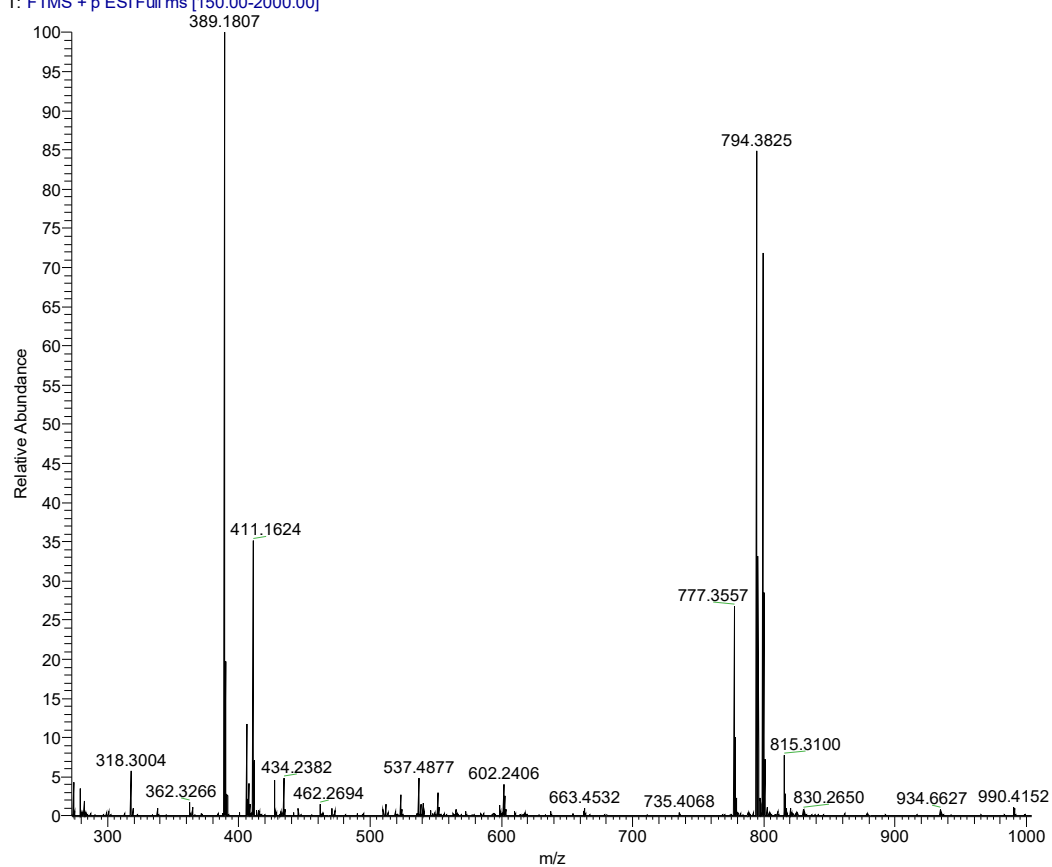

**Figure S14.** The HRESIMS spectrum of compound **2**



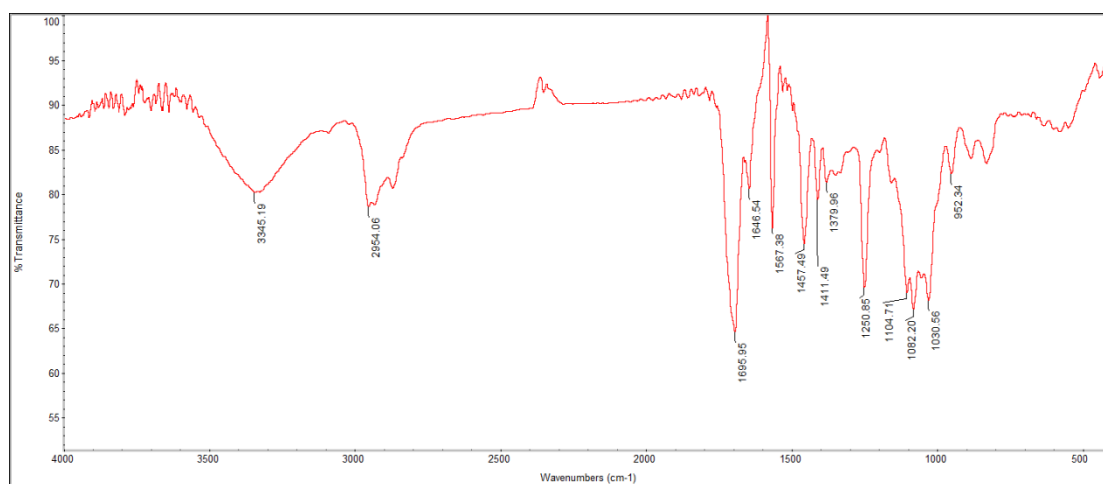

**Figure S15.** The IR spectrum of compound **2**

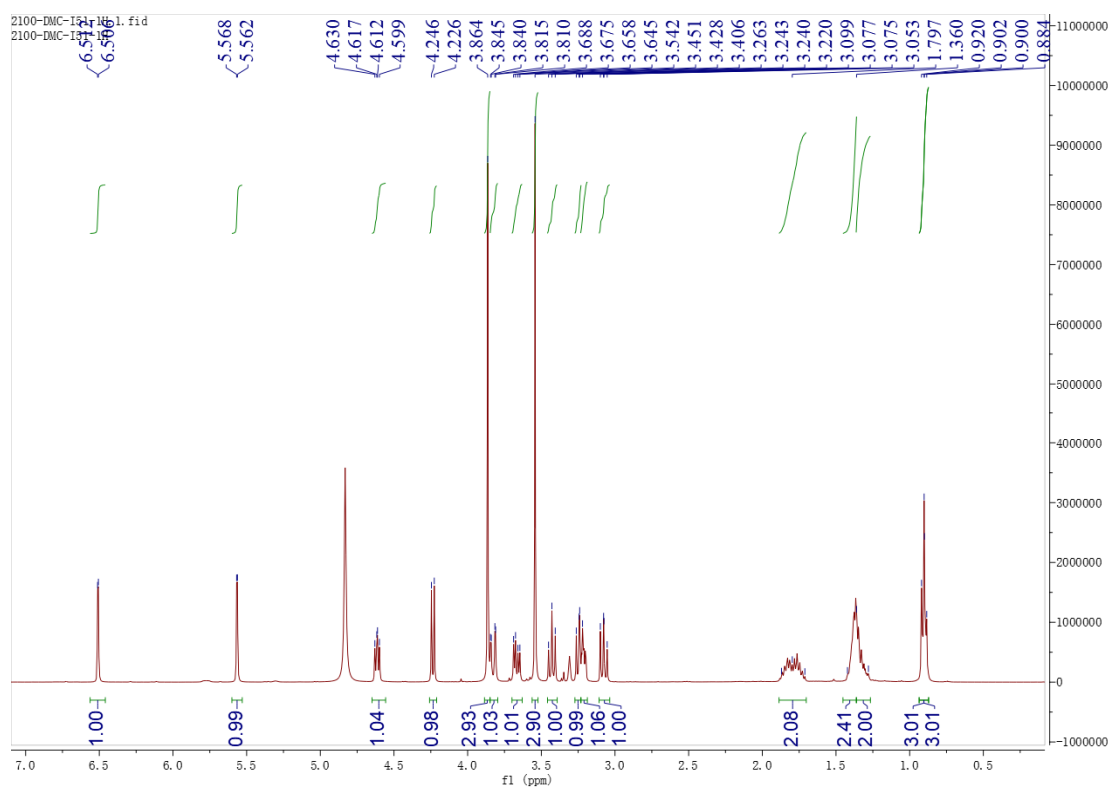

**Figure S16.** <sup>1</sup>H NMR (400 MHz, Methanol-*d*<sub>4</sub>) spectrum of compound **3**

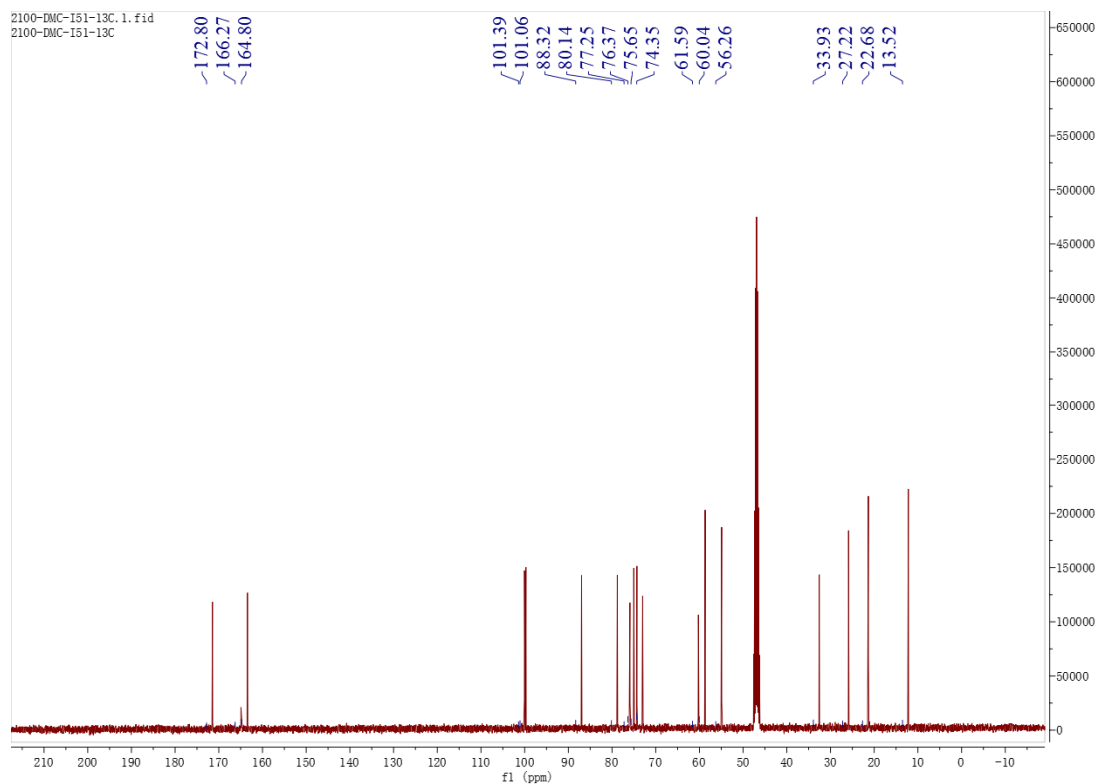

**Figure S17.**  $^{13}\text{C}$  NMR (100 MHz, Methanol- $d_4$ ) spectrum of compound **3**

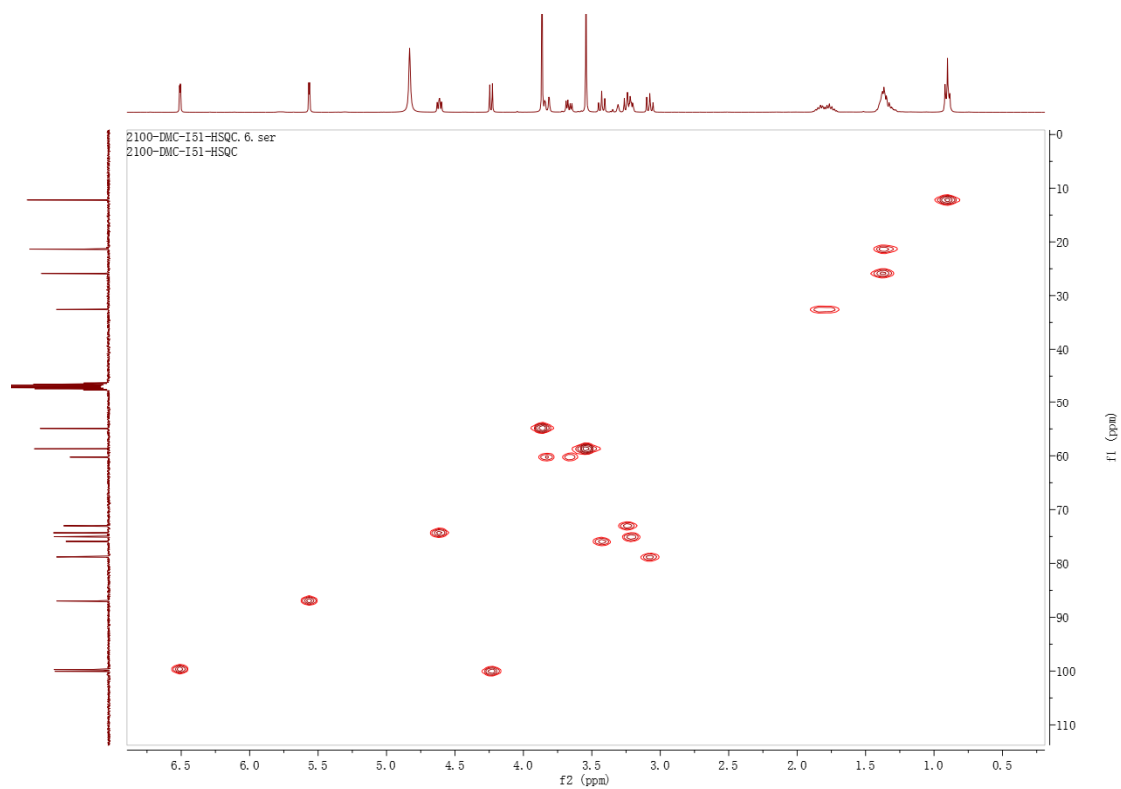

**Figure S18.** The HSQC (Methanol- $d_4$ ) spectrum of compound **3**

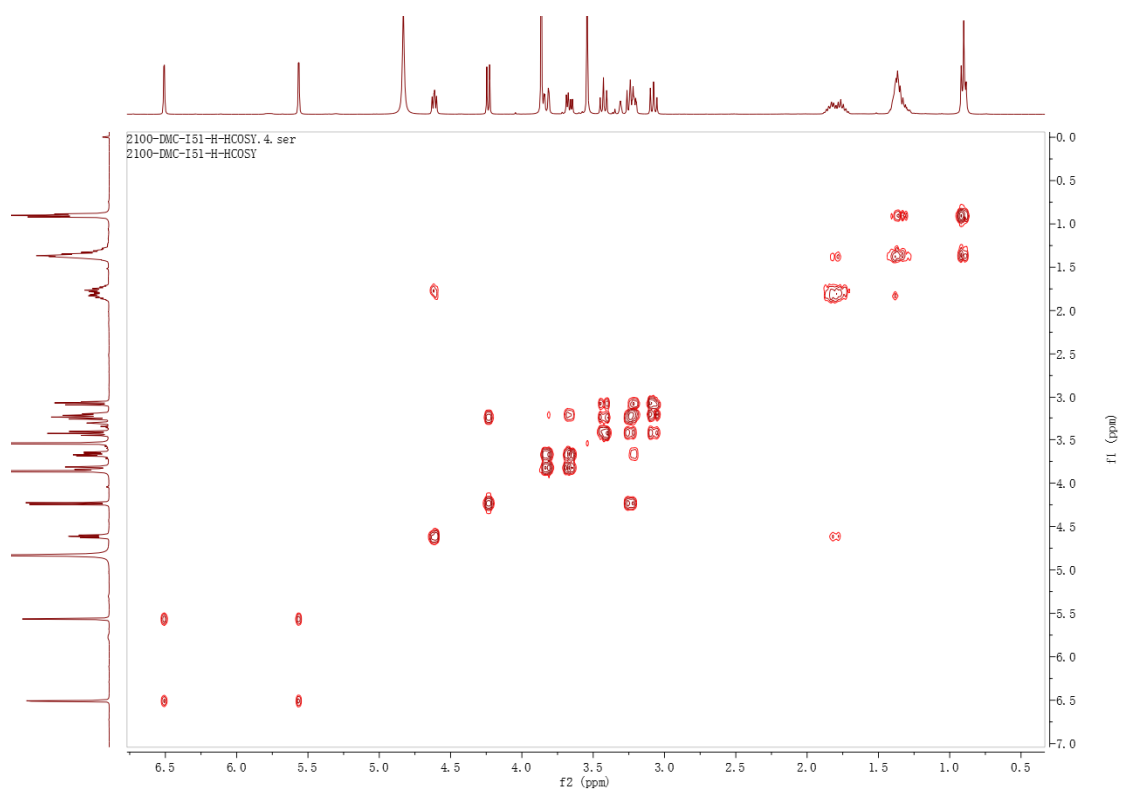

**Figure S19.** The  $^1\text{H}$ - $^1\text{H}$  COSY (Methanol- $d_4$ ) spectrum of compound **3**

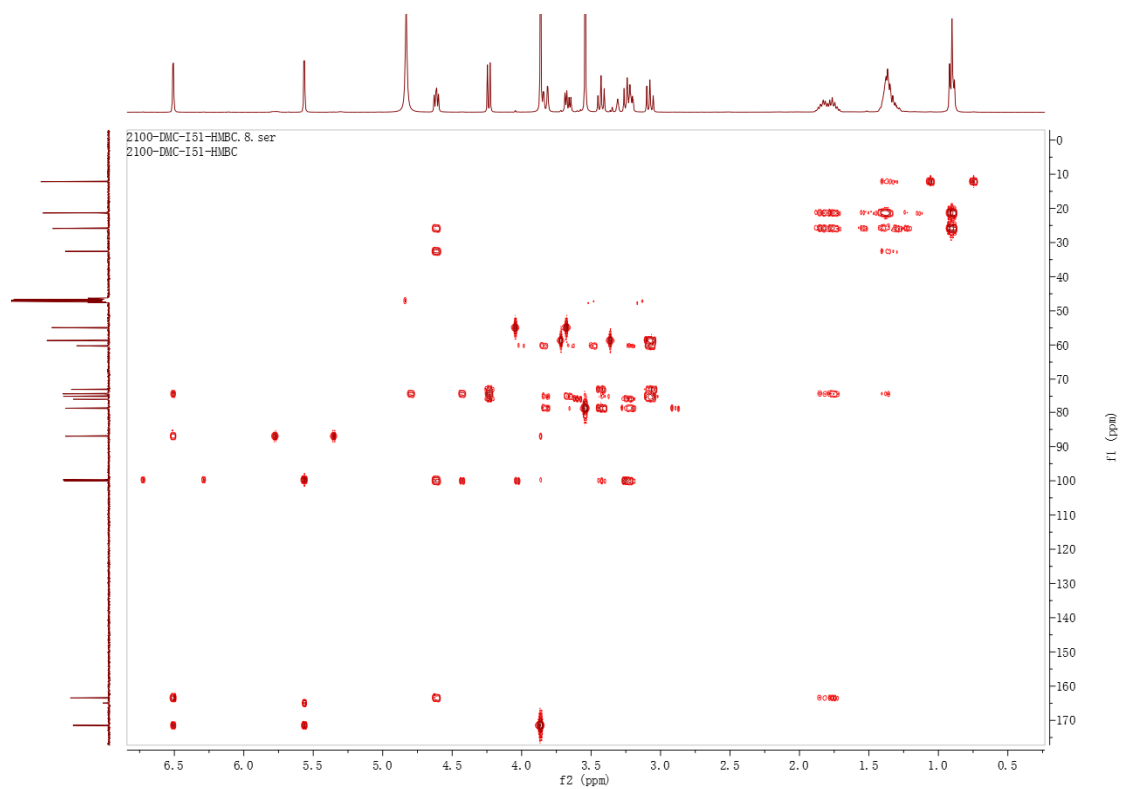

**Figure S20.** The HMBC (Methanol- $d_4$ ) spectrum of compound **3**

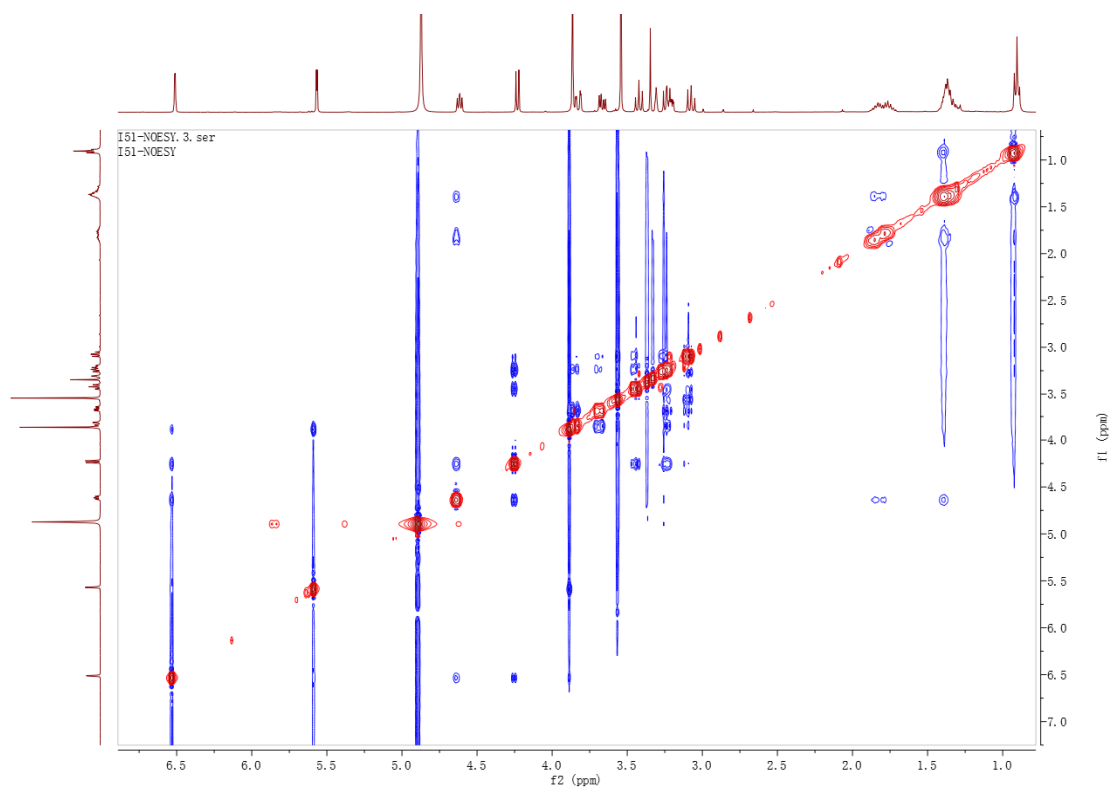

**Figure S21.** The NOESY (Methanol- $d_4$ ) spectrum of compound **3**

20201011-DZ100-E-2\_201011102014 #37 RT: 0.30 AV: 1 NL: 3.12E7  
T: FTMS + p ESI Full ms [150.00-2000.00]

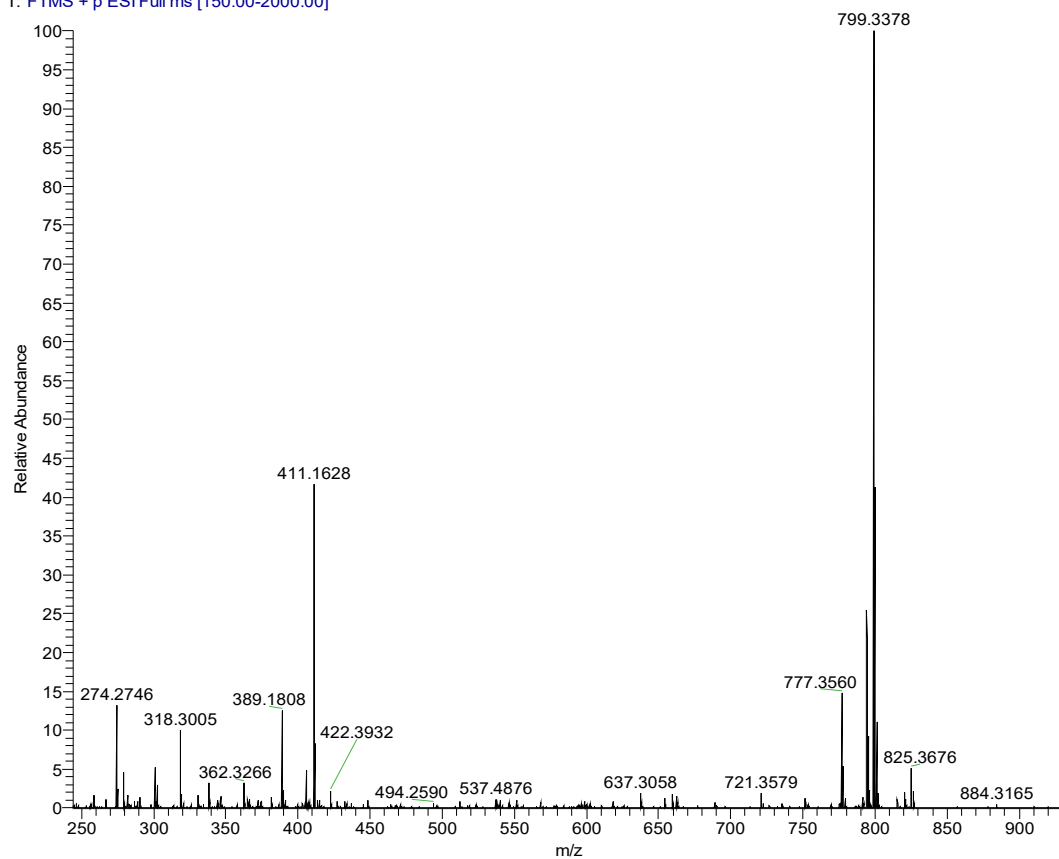

**Figure S22.** The HRESIMS spectrum of compound **3**

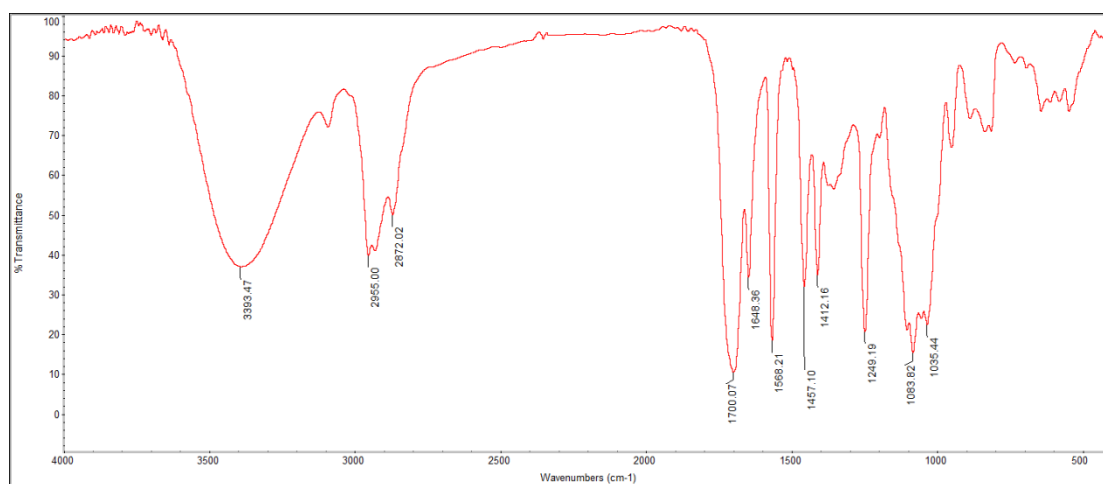

**Figure S23.** The IR spectrum of compound **3**

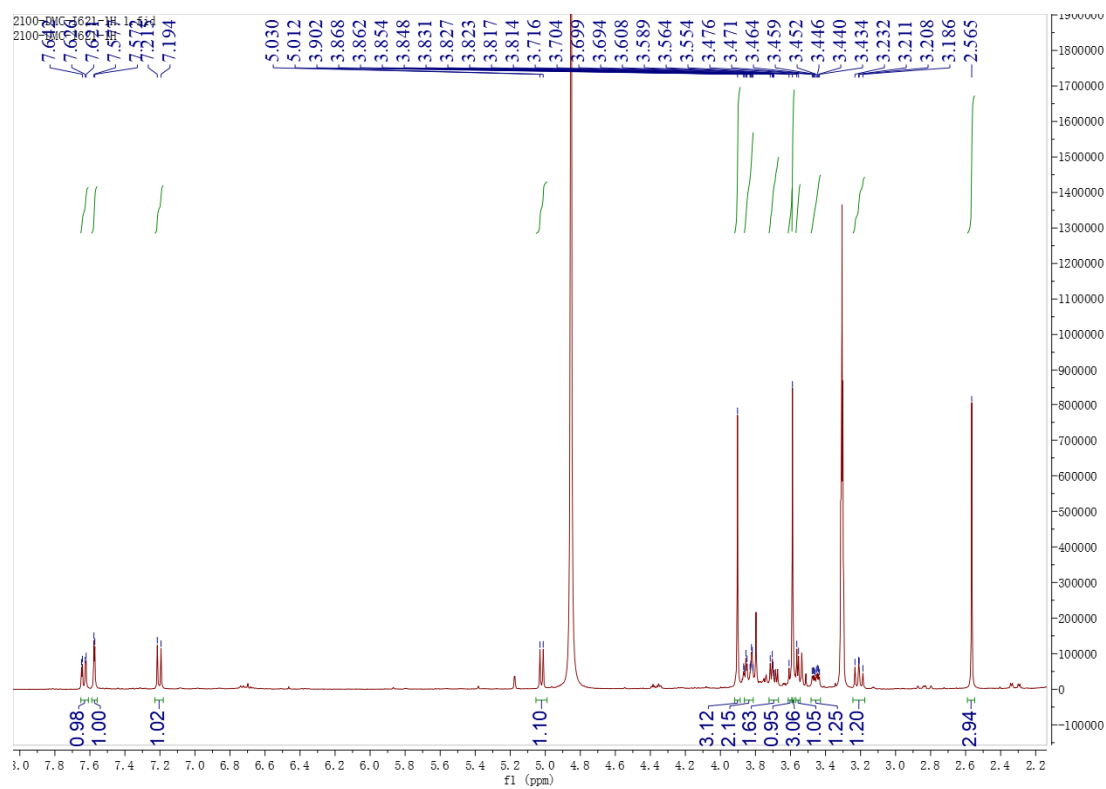

**Figure S24.** <sup>1</sup>H NMR (400 MHz, Methanol-*d*<sub>4</sub>) spectrum of compound **4**

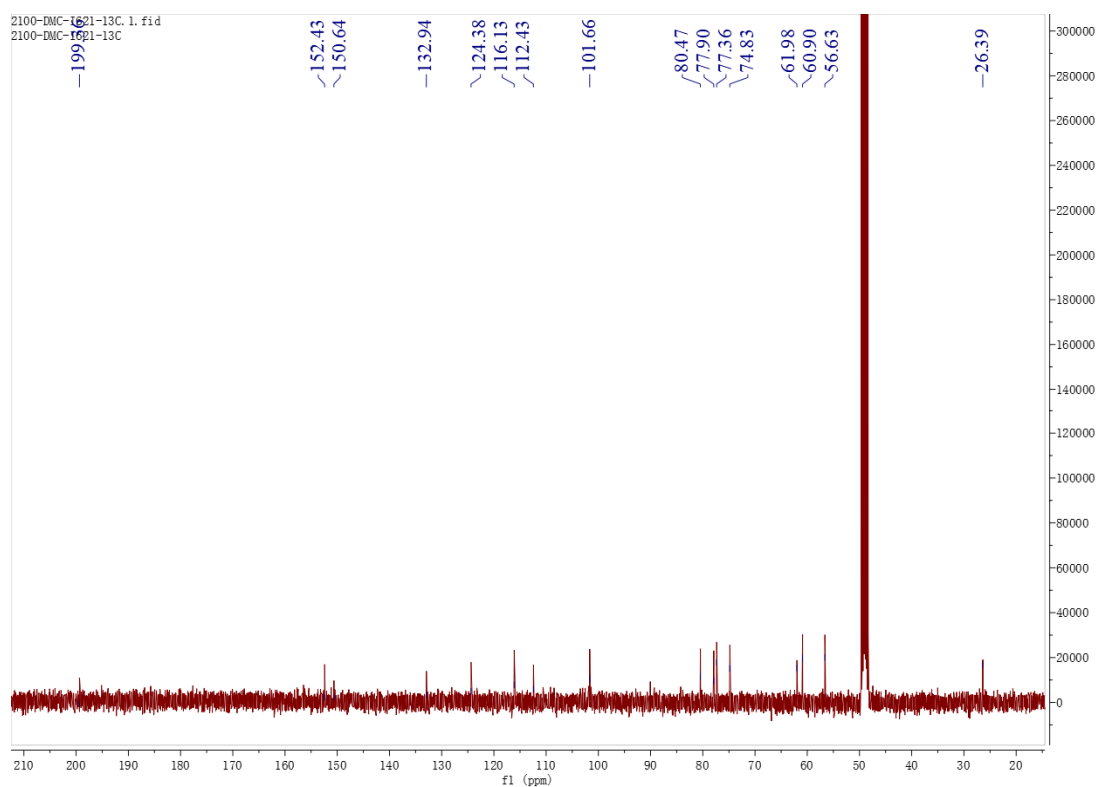

**Figure S25.**  $^{13}\text{C}$  NMR (100 MHz, Methanol- $d_4$ ) spectrum of compound **4**

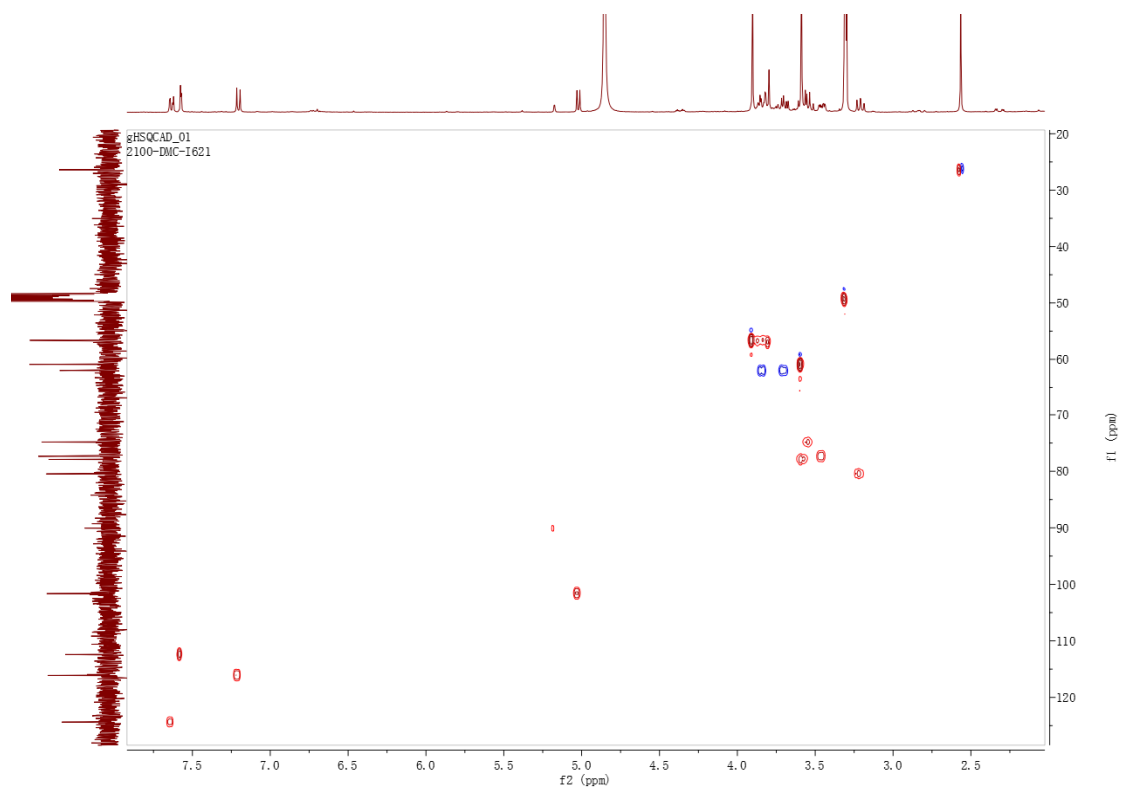

**Figure S26.** The HSQC (Methanol- $d_4$ ) spectrum of compound **4**

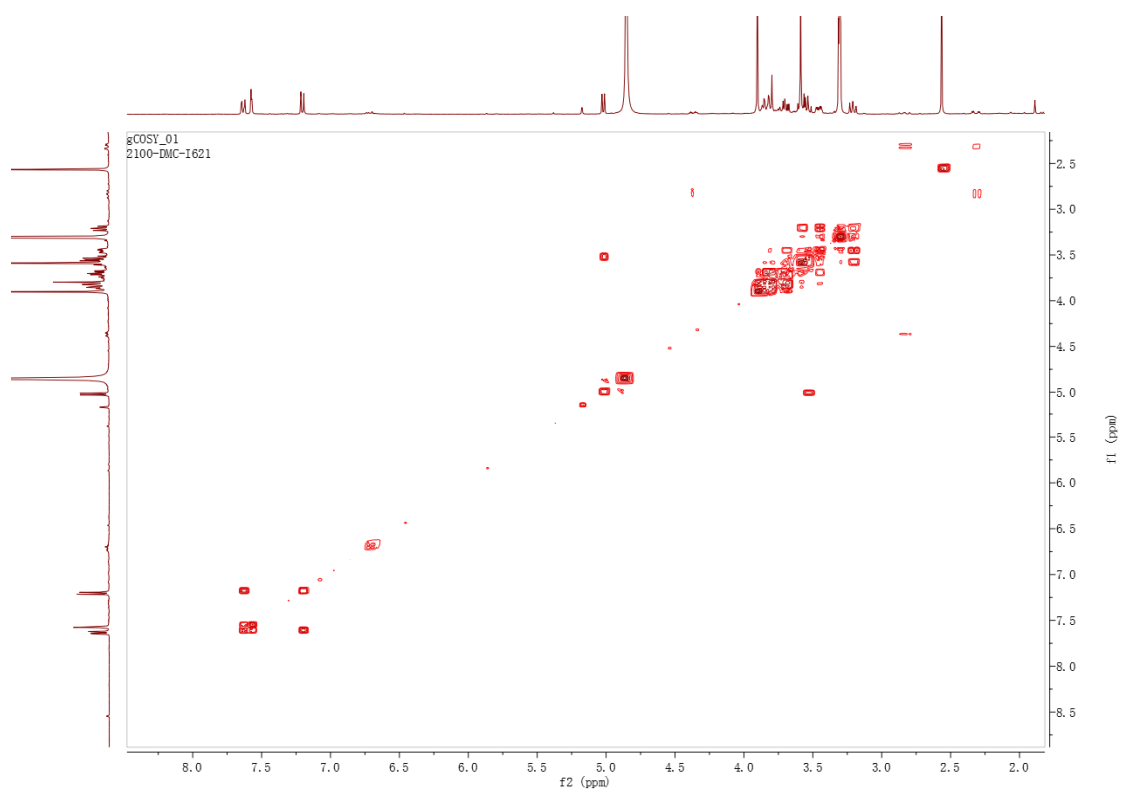

**Figure S27.** The  $^1\text{H}$ - $^1\text{H}$  COSY (Methanol- $d_4$ ) spectrum of compound **4**

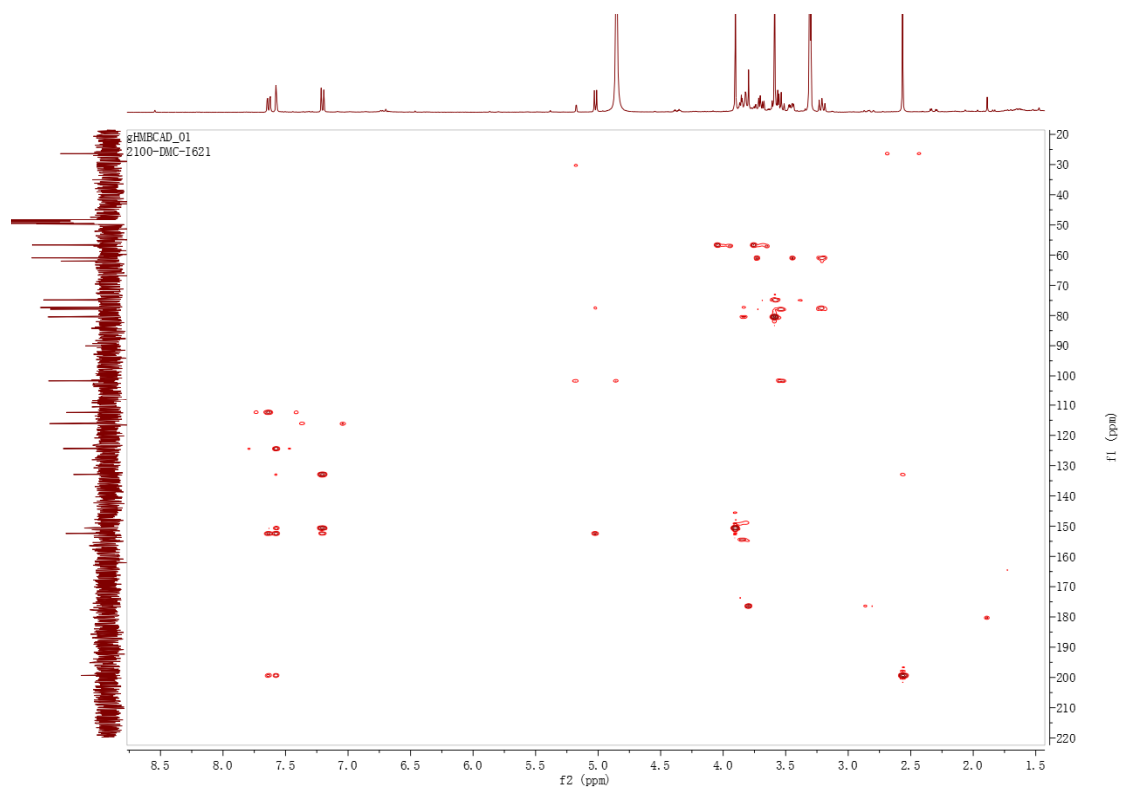

**Figure S28.** The HMBC (Methanol- $d_4$ ) spectrum of compound **4**

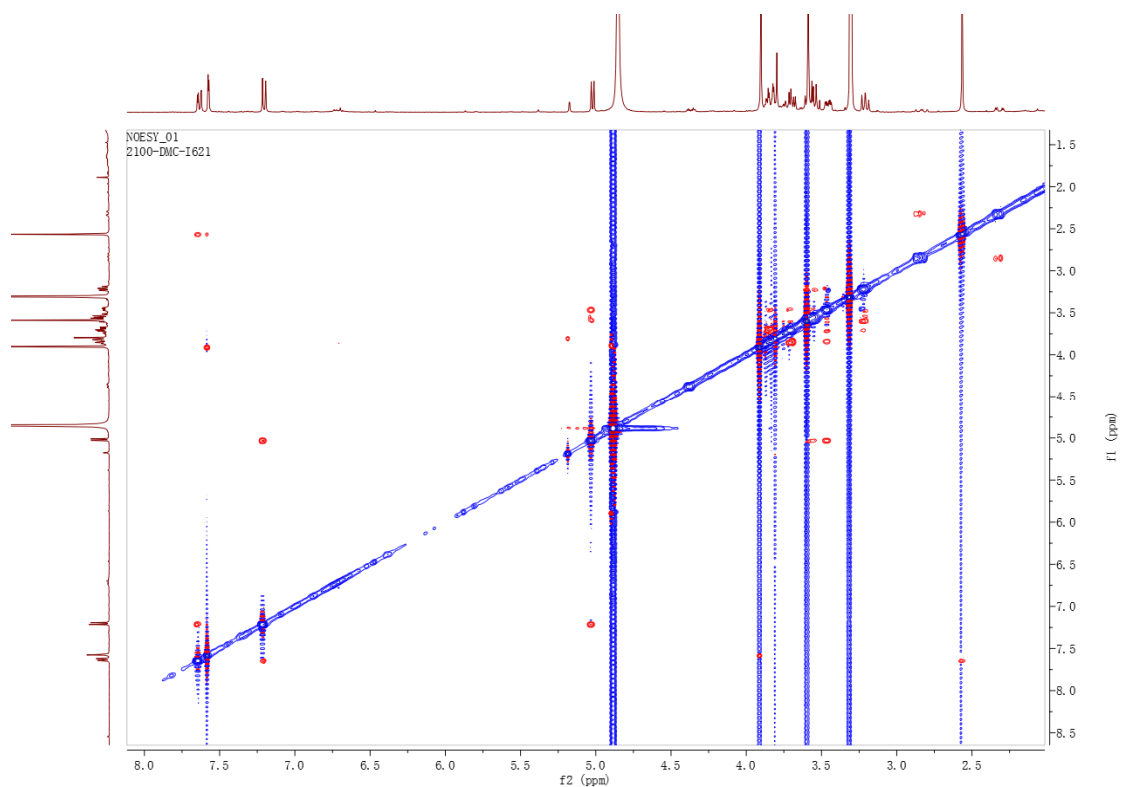

**Figure S29.** The NOESY (Methanol- $d_4$ ) spectrum of compound **4**

20211004-DMC-I261\_211004113803 #80-82 RT: 0.67-0.69 AV: 3 NL: 9.66E5  
T: FTMS + p ESI Full ms [150.00-1000.00]

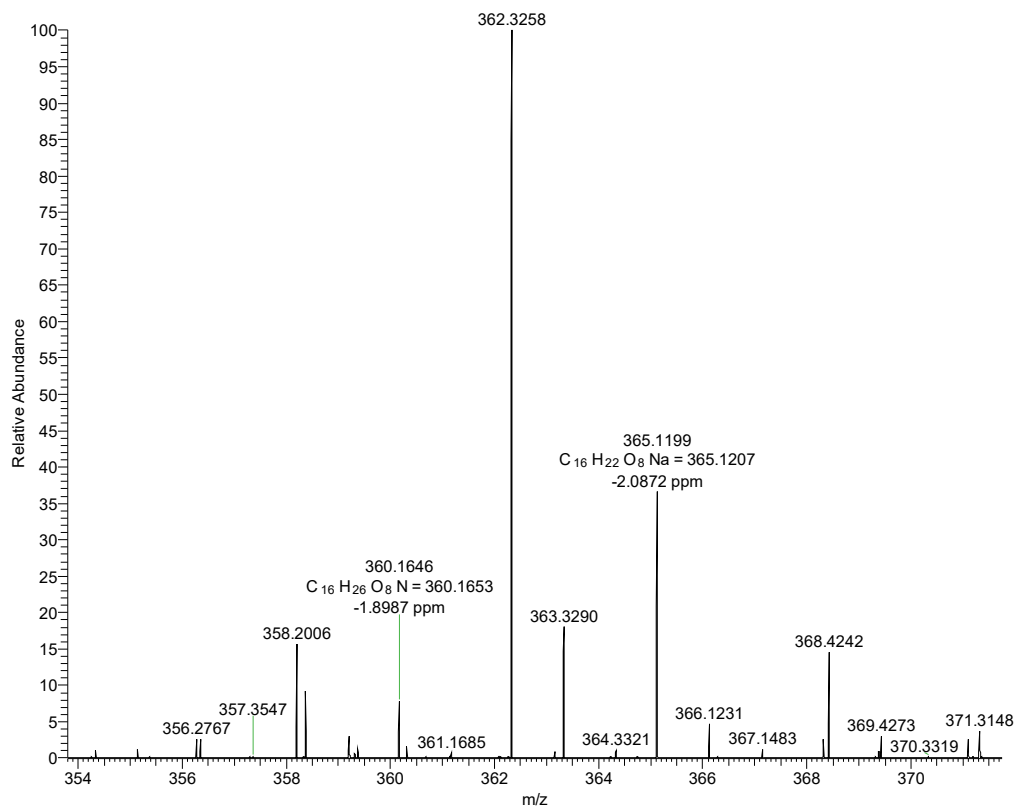

**Figure S30.** The HRESIMS spectrum of compound **4**



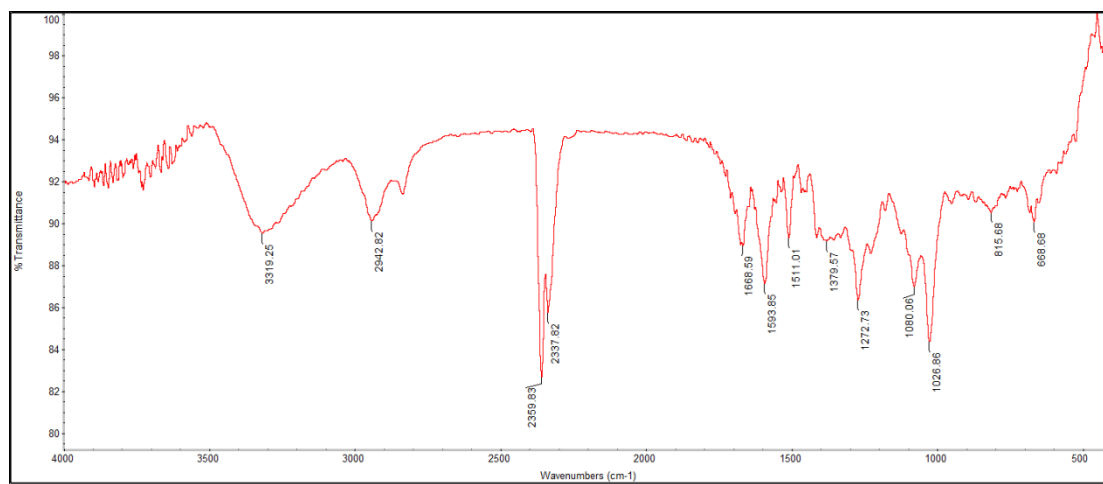

**Figure S31.** The IR spectrum of compound **4**
